# Supplementary material
Source: MDPI journal article supplement (https://www.mdpi.com/2311-553X/8/1/8)
Supplement: s1 [file s1]

## Article

# Direct Comparison of Chol-siRNA Polyplexes and Chol-DsiRNA Polyplexes Targeting STAT3 in a Syngeneic Murine Model of TNBC

Zhen Ye <sup>1</sup>, Mai Mohamed Abdelmoaty <sup>1,2</sup>, Stephen M. Curran <sup>1</sup>, Shetty Ravi Dyavar <sup>3,†</sup>, Devendra Kumar <sup>1</sup>, Yazen Alnouti <sup>1,4</sup>, Don W. Coulter <sup>5</sup>, Anthony T. Podany <sup>3</sup>, Rakesh K. Singh <sup>4,6</sup> and Joseph A. Vetro <sup>1,4,\*</sup>

<sup>1</sup> Department of Pharmaceutical Sciences, College of Pharmacy, University of Nebraska Medical Center, Omaha, NE 68198, USA; yezhen1@gmail.com (Z.Y.); mai.mostafa@unmc.edu (M.M.A.); smcurran@unmc.edu (S.M.C.); devendra.kumar@unmc.edu (D.K.); yalnouti@unmc.edu (Y.A.)

<sup>2</sup> Therapeutic Chemistry Department, Pharmaceutical and Drug Industries Research Division, National Research Centre, Giza 12622, Egypt

<sup>3</sup> Department of Pharmacy Practice, College of Pharmacy, University of Nebraska Medical Center, Omaha, NE 68198, USA; dyavarsravi@gmail.com (S.R.D.); apodany@unmc.edu (A.T.P.)

<sup>4</sup> Center for Drug Delivery and Nanomedicine, University of Nebraska Medical Center, Omaha, NE 68198, USA

<sup>5</sup> Department of Pediatrics, Division of Pediatric Hematology/Oncology, University of Nebraska Medical Center, Omaha, NE 68198, USA; dwcoulter@unmc.edu (D.W.C.)

<sup>6</sup> Department of Pathology and Microbiology, University of Nebraska Medical Center, Omaha, NE 68198, USA; rsingh@unmc.edu

\* Correspondence: jvetro@unmc.edu; Tel.: +1-402-559-9359

† Current address: Adicet Bio, Inc., 200 Constitution Dr, Menlo Park, CA 94025, USA.

**Citation:** Ye, Z.; Abdelmoaty, M.M.; Curran, S.M.; Dyavar, S.R.; Kumar, D.; Alnouti, Y.; Coulter, D.W.; Podany, A.T.; Singh, R.K.; Vetro, J.A. Direct Comparison of Chol-siRNA Polyplexes and Chol-DsiRNA Polyplexes Targeting STAT3 in a Syngeneic Murine Model of TNBC. *Non-coding RNA* **2022**, *8*, 8. <https://doi.org/10.3390/ncrna8010008>

## Supplementary Materials

Academic Editors: Sébastien Pfeffer and Anil K. Sood

Received: 10 September 2021

Accepted: 10 January 2022

Published: 13 January 2022

**Publisher's Note:** MDPI stays neutral with regard to jurisdictional claims in published maps and institutional affiliations.

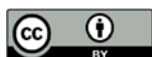

**Copyright:** © 2022 by the authors. Licensee MDPI, Basel, Switzerland. This article is an open access article distributed under the terms and conditions of the Creative Commons Attribution (CC BY) license (<https://creativecommons.org/licenses/by/4.0/>).

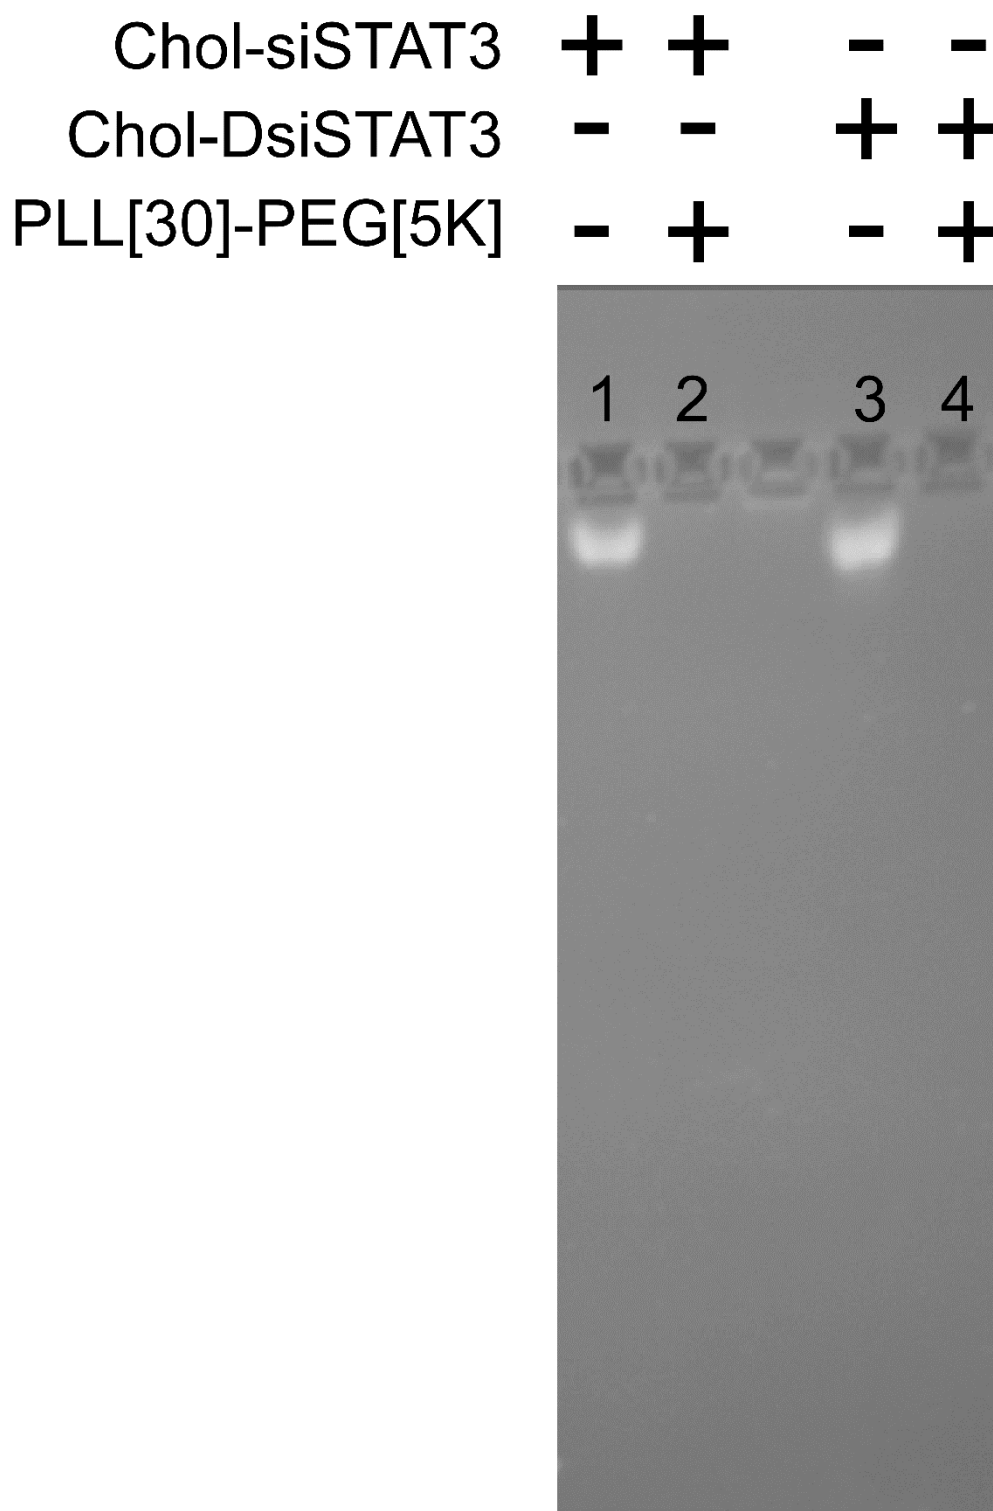

**Figure S1.** Complexation of Chol-siSTAT3 and Chol-DsiSTAT3 with PLL[30]-PEG[5K]. (A) Chol-siSTAT3 or Chol-DsiSTAT3 was incubated with PLL[30]-PEG[5K] in 0.1 M HEPES [pH 7.4] for 30 minutes at room temperature. Chol-siSTAT3 alone (Lane 1), Chol-siSTAT3 Polyplexes [N/P 3] (Lane 2), Chol-DsiSTAT3 alone (Lane 3), and Chol-DsiSTAT3 Polyplexes [N/P 1] (Lane 4) (90 ng Chol-RNAi each) were then separated on a 4% TBE agarose gel (120 V, 30 min) that was post-stained with SYBR Green II for subsequent imaging. Data are representative of at least two independent experiments.

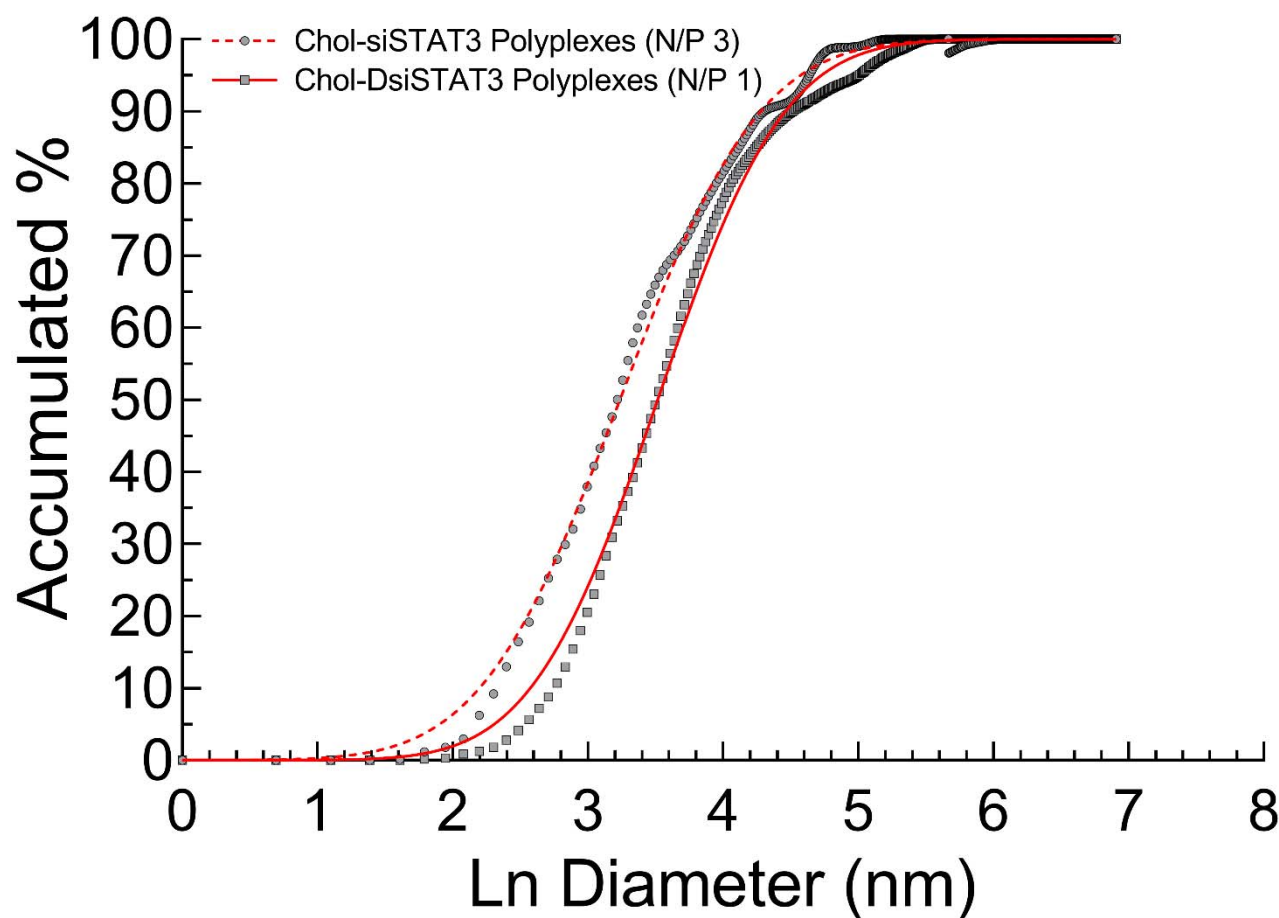

**Figure S2.** Representative Distributions of Chol-siCTRL Polyplex and Chol-DsiCTRL Polyplex Diameters. Average diameters of Chol-siCTRL Polyplexes and Chol-DsiCTRL Polyplexes  $\pm$  SD ( $n = 3$  independent sample measurements) were determined in 0.1 M HEPES, pH 7.4 by nanoparticle tracking analysis (NTA). A plot of accumulated percent of total Chol-siRNA Polyplexes (grey circles) or Chol-DsiRNA Polyplexes (grey squares) at each diameter (y-axis) vs. Ln diameter (x-axis) was then fit against a cumulative Gaussian (percent) model using GraphPad Prism 9 to determine a best-fit mean (dashed red line for Chol-siCTRL Polyplexes and solid red line for Chol-DsiCTRL Polyplexes) and standard deviation from the lognormal curve. Data for Chol-DsiCTRL Polyplexes taken from [2].

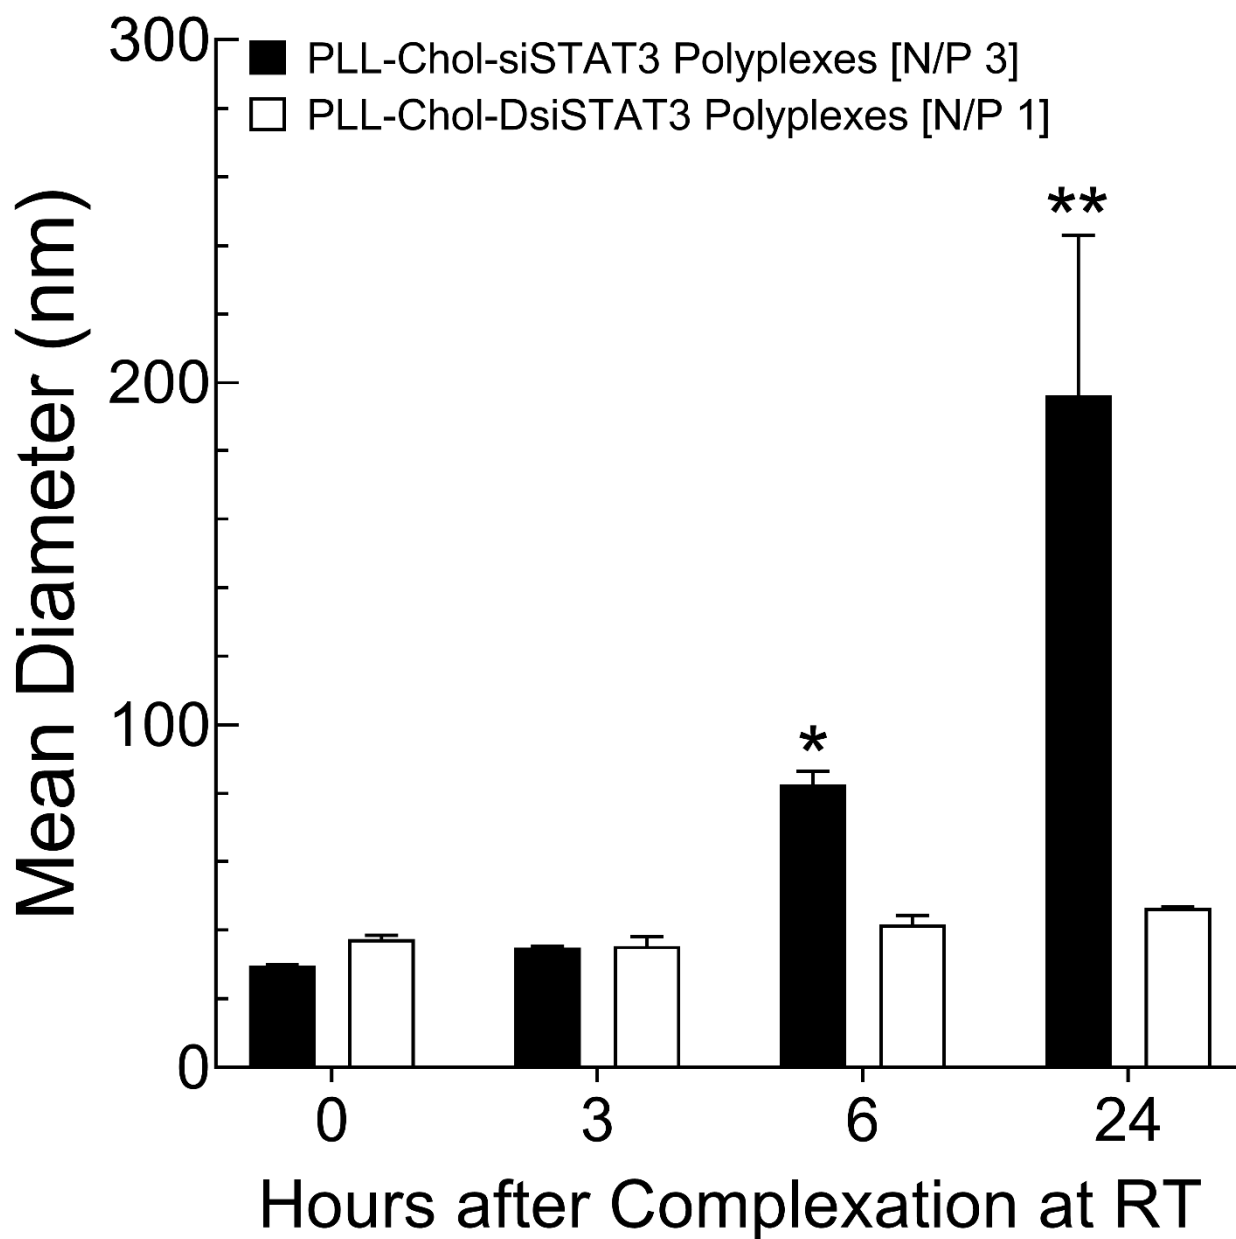

**Figure S3.** Physical stabilities of Chol-siSTAT3 Polyplexes and Chol-DsiSTAT3 Polyplexes in solution over 24 hours. Average hydrodynamic diameters of Chol-siSTAT3 Polyplexes and Chol-DsiSTAT3 Polyplexes  $\pm$  SD ( $n = 3$  independent sample measurements) in 0.1 M HEPES, pH 7.4 were determined by nanoparticle tracking analysis (NTA) (Figure S2) after incubation at room temperature for the indicated time points and compared vs. time point 0 by Ordinary one-way ANOVA with Dunnet's post-test where  $*p < 0.05$  and  $**p < 0.01$ .

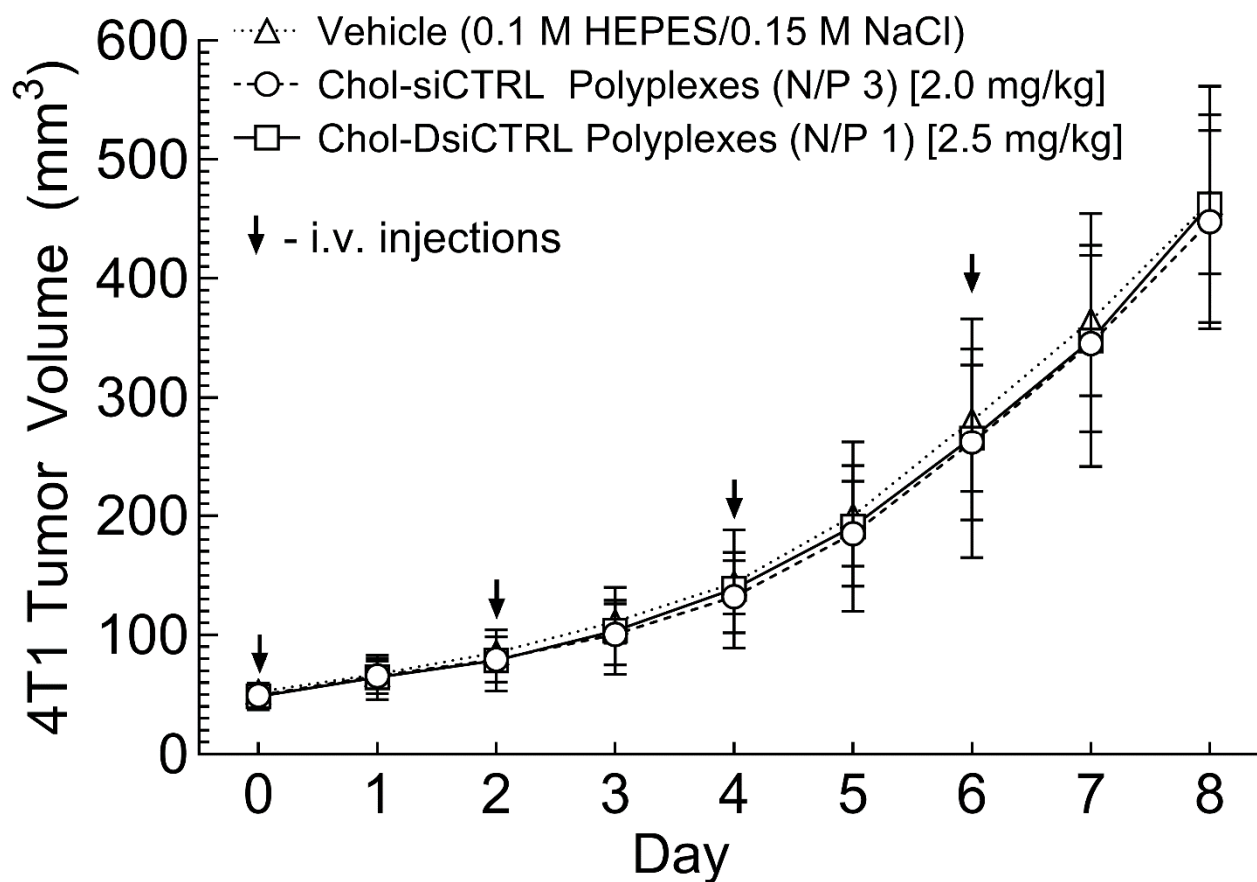

**Figure S4.** Effect of inactive Chol-siCTRL and Chol-DsiCTRL Polyplexes on the growth of primary 4T1 syngeneic breast tumors after multiple i.v. treatments. Vehicle alone (white triangles) or vehicle containing an equimolar dose of inactive Chol-siCTRL (white circles) or inactive Chol-DsiCTRL (white squares) complexed with PLL[30]-PEG[5K] at the indicated N/P ratio was injected into the tail veins of female BALB/c mice (black arrows) bearing a single subcutaneous 4T1 breast tumor (30 to 50 mm<sup>3</sup>). Average daily tumor volumes  $\pm$ SD ( $n = 5$  mice) were then determined by 3D surface scanning and compared at each time point by Multiple t-tests. Data for Vehicle and Chol-DsiCTRL taken from [2].

**Table S1:** Actual normalized STAT3 mRNA copy numbers for electroporation and transfection studies in 4T1 cells (Figure 2).

| Treatment                             | Hours Post-Treatment | STAT3 mRNA copies/ ng cDNA ( $\pm$ SD) <sup>a</sup> |
|---------------------------------------|----------------------|-----------------------------------------------------|
| <i>Electroporation</i>                |                      |                                                     |
| Electroporation only <sup>c</sup>     | 24                   | 353 (29)                                            |
| "                                     | 48                   | 435 (4)                                             |
| "                                     | 72                   | 432 (20)                                            |
| siCTRL                                | 24                   | 333 (19)                                            |
| siSTAT3                               | 24                   | 70 (1)                                              |
| "                                     | 48                   | 263 (7)                                             |
| "                                     | 72                   | 390 (12)                                            |
| DsiCTRL <sup>c</sup>                  | 24                   | 325 (13)                                            |
| DsiSTAT3 <sup>c</sup>                 | 24                   | 68 (1)                                              |
| "                                     | 48                   | 248 (14)                                            |
| "                                     | 72                   | 392 (7)                                             |
| <i>Transfection</i>                   |                      |                                                     |
| Untreated <sup>c</sup>                | 24                   | 371(18)                                             |
| "                                     | 48                   | 472 (10)                                            |
| "                                     | 72                   | 520 (17)                                            |
| Chol-siCTRL Polyplexes                | 24                   | 328 (15)                                            |
| Chol-siSTAT3 Polyplexes               | 24                   | 155 (7)                                             |
| "                                     | 48                   | 287 (12)                                            |
| "                                     | 72                   | 490 (14)                                            |
| Chol-DsiCTRL Polyplexes <sup>c</sup>  | 24                   | 325 (13)                                            |
| Chol-DsiSTAT3 Polyplexes <sup>c</sup> | 24                   | 134 (15)                                            |
| "                                     | 48                   | 298 (9)                                             |
| "                                     | 72                   | 479 (14)                                            |

<sup>a</sup> Average STAT3 mRNA copies/ng cDNA  $\pm$  propagated SD ( $n = 2$  ddPCR replicates from two independent electroporations) determined by RT-ddPCR. <sup>c</sup> Data from [2].

**Table S2:** Actual STAT3 and HPRT1 mRNA copy numbers for potency and kinetics studies in primary 4T1 breast tumors (Figure 3).

| Treatment                                         | Hours Post-treatment | STAT3 mRNA<br>copies/ ng cDNA ( $\pm$<br>SD) <sup>a</sup> | HPRT1 mRNA<br>copies/ ng cDNA ( $\pm$<br>SD) <sup>a</sup> | STAT3/HPRT1 Ratio<br>( $\pm$ SD) <sup>b</sup> |
|---------------------------------------------------|----------------------|-----------------------------------------------------------|-----------------------------------------------------------|-----------------------------------------------|
| <i>Potency (ED<sub>50</sub>)</i>                  |                      |                                                           |                                                           |                                               |
| Vehicle (Chol-siSTAT3 Polyplexes)                 | 48                   | 2116 (157)                                                | 1119 (78)                                                 | 1.9 (0.2)                                     |
| Chol-siCTRL Polyplexes [4.0 mg/kg]                | 48                   | 2259 (137)                                                | 1165 (154)                                                | 1.9 (0.3)                                     |
| Chol-siSTAT3 Polyplexes (0.24 mg/kg]              | 48                   | 1309 (86)                                                 | 865 (47)                                                  | 1.5 (0.1)                                     |
| Chol-siSTAT3 Polyplexes [0.48 mg/kg]              | 48                   | 1396 (155)                                                | 1098 (115)                                                | 1.3 (0.2)                                     |
| Chol-siSTAT3 Polyplexes [0.8 mg/kg]               | 48                   | 1327 (71)                                                 | 1170 (70)                                                 | 1.1 (0.1)                                     |
| Chol-siSTAT3 Polyplexes [2.0 mg/kg]               | 48                   | 1505 (109)                                                | 1433 (95)                                                 | 1.0 (0.1)                                     |
| Chol-siSTAT3 Polyplexes [4.0 mg/kg]               | 48                   | 1278 (90)                                                 | 1268 (100)                                                | 1.0 (0.1)                                     |
| Vehicle (Chol-DsiSTAT3 Polyplexes) <sup>c</sup>   | 48                   | 2449 (69)                                                 | 1270 (52)                                                 | 1.9 (0.1)                                     |
| Chol-DsiCTRL Polyplexes [5.0 mg/kg] <sup>c</sup>  | 48                   | 2910 (330)                                                | 1447 (197)                                                | 2.0 (0.4)                                     |
| Chol-DsiSTAT3 Polyplexes [0.3 mg/kg] <sup>c</sup> | 48                   | 2205 (78)                                                 | 1453 (49)                                                 | 1.5 (0.1)                                     |
| Chol-DsiSTAT3 Polyplexes [0.6 mg/kg] <sup>c</sup> | 48                   | 2181 (118)                                                | 1734 (92)                                                 | 1.3 (0.1)                                     |
| Chol-DsiSTAT3 Polyplexes [1.0 mg/kg] <sup>c</sup> | 48                   | 1832 (104)                                                | 1582 (65)                                                 | 1.2 (0.1)                                     |
| Chol-DsiSTAT3 Polyplexes [2.5 mg/kg] <sup>c</sup> | 48                   | 2258 (94)                                                 | 2055 (124)                                                | 1.1 (0.1)                                     |
| Chol-DsiSTAT3 Polyplexes [5.0 mg/kg] <sup>c</sup> | 48                   | 2125 (80)                                                 | 2053 (109)                                                | 1.0 (0.1)                                     |
| <i>Kinetics</i>                                   |                      |                                                           |                                                           |                                               |
| Vehicle <sup>c</sup>                              | 24                   | 2844 (316)                                                | 1554 (213)                                                | 1.8 (0.3)                                     |
| "                                                 | 48                   | 3233 (863)                                                | 1701 (444)                                                | 1.9 (0.7)                                     |
| "                                                 | 72                   | 2571 (419)                                                | 1334 (183)                                                | 1.9 (0.4)                                     |
| "                                                 | 96                   | 2831 (328)                                                | 1514 (156)                                                | 1.9 (0.3)                                     |
| Chol-siSTAT3 Polyplexes [0.41 mg/kg]              | 24                   | 2911 (263)                                                | 1788 (141)                                                | 1.6 (0.2)                                     |
| "                                                 | 48                   | 2202 (164)                                                | 2009 (125)                                                | 1.1 (0.1)                                     |
| "                                                 | 72                   | 3016 (455)                                                | 1803 (257)                                                | 1.7 (0.3)                                     |
| "                                                 | 96                   | 2739 (244)                                                | 1585 (167)                                                | 1.7 (0.2)                                     |
| Chol-DsiSTAT3 Polyplexes [0.5 mg/kg] <sup>c</sup> | 24                   | 2865 (169)                                                | 1742 (83)                                                 | 1.6 (0.1)                                     |
| "                                                 | 48                   | 1537 (126)                                                | 1409 (121)                                                | 1.1 (0.1)                                     |
| "                                                 | 72                   | 2724 (386)                                                | 1593 (221)                                                | 1.7 (0.3)                                     |

|                                                                                                                                                                                                                                                                          |    |            |            |           |
|--------------------------------------------------------------------------------------------------------------------------------------------------------------------------------------------------------------------------------------------------------------------------|----|------------|------------|-----------|
| “                                                                                                                                                                                                                                                                        | 96 | 2666 (248) | 1506 (138) | 1.8 (0.2) |
| <sup>a</sup> Average mRNA copies/ng cDNA ± propagated SD in primary 4T1 breast tumors ( <i>n</i> = 3 ddPCR replicates from 5 mice) determined by RT-ddPCR. <sup>b</sup> Ratio of STAT3 mRNA copy number / HPRT1 copy number ± propagated SD. <sup>c</sup> Data from [2]. |    |            |            |           |
